# Supplementary material for: Acute regulation of murine adipose tissue lipolysis and insulin resistance by the TGFβ superfamily protein GDF3
Source: Springer Nature journal article supplement (doi:10.1038/s41467-025-59673-7), 2025-05-13
Supplement: MOESM1 [file 41467_2025_59673_MOESM1_ESM.pdf]

**Acute regulation of murine adipose tissue lipolysis and insulin resistance by the TGF $\beta$  superfamily protein GDF3**

Nagasuryaprasad Kotikalapudi<sup>1,#</sup>, Deepti Ramachandran<sup>1,#</sup>, Daniel Vieira<sup>1</sup>, William Bernard Rubio<sup>1</sup>, Gregory R. Gipson<sup>2</sup>, Luca Troncone<sup>3</sup>, Kylie Vestal<sup>2</sup>, David E. Maridas<sup>4</sup>, Vicki Rosen<sup>4</sup>, Paul B. Yu<sup>3</sup>, Thomas B. Thompson<sup>2</sup>, Alexander S. Banks<sup>1\*</sup>

<sup>1</sup>Division of Endocrinology, Diabetes and Metabolism, Beth Israel Deaconess Medical Center and Harvard Medical School, Boston, MA, USA.

<sup>2</sup>Department of Molecular & Cellular Biosciences, University of Cincinnati College of Medicine, Cincinnati, OH, USA.

<sup>3</sup>Cardiovascular Research Center, Massachusetts General Hospital and Harvard Medical School, Boston, MA, USA.

<sup>4</sup>Department of Developmental Biology, Harvard School of Dental Medicine, Boston, MA USA.

#These authors contributed equally.

\*corresponding author: [asbanks@bidmc.harvard.edu](mailto:asbanks@bidmc.harvard.edu)

## **SUPPLEMENTARY INFORMATION**

**Table S1. Recombinant proteins**

| Recombinants | Species           | Catalog No     | Company         | Used for                                                             |
|--------------|-------------------|----------------|-----------------|----------------------------------------------------------------------|
| GDF3         | Mouse             | 9009-GD-010    | R&D Systems     | Flow Cytometry, BLI, ITC,<br>luciferase reporter assay,<br>lipolysis |
| GDF3         | Human             | 5754-G3-010    | R&D Systems     | BLI                                                                  |
| GDF3         | Human             | 5754-G3-010/CF | R&D Systems     | SPR                                                                  |
| BMP2         | Human             | N/A            | Vicki Rosen lab | Flow Cytometry, lipolysis                                            |
| BMP2         | Human/ Mouse/ Rat | 120-02C-10UG   | PeproTech       | ITC, lipolysis                                                       |
| BMP4         | Mouse             | 5020-BP-010    | R&D Systems     | ITC, lipolysis                                                       |
| BMP7         | Mouse             | 5666-BP-010    | R&D Systems     | Flow Cytometry                                                       |
| BMP9         | Human             | 3209-BP-010    | R&D Systems     | Flow Cytometry, lipolysis                                            |
| BMP10        | Mouse             | 6038-BP-025    | R&D Systems     | Flow Cytometry, lipolysis                                            |
| TGFβ1        | Human             | T7039          | Millipore Sigma | Flow Cytometry, lipolysis                                            |
| BMPRII-Fc    | Human/ Mouse      | 811-BR-100     | R&D Systems     | SPR, BLI, ITC                                                        |
| TGFBRII-Fc   | Human             | 341-BR-050/CF  | R&D Systems     | SPR                                                                  |
| ACTRIIA-Fc   | Human             | 340-R2-100/CF  | R&D Systems     | SPR                                                                  |
| ACTRIIB-Fc   | Human             | 339-RB-100/CF  | R&D Systems     | SPR                                                                  |
| IgG-Fc       | Human             | 160024         | Gator Bio       | BLI                                                                  |
| IgG-Fc       | Mouse             | 160004         | Gator Bio       | BLI                                                                  |

**Table S2. Antibodies**

| Antibody                    | Host Species     | Catalog No | Company                   |
|-----------------------------|------------------|------------|---------------------------|
| anti-GDF3                   | Rabbit [EPR4828] | ab108617   | Abcam                     |
| anti- $\beta$ -actin        | Mouse            | A1978      | Sigma                     |
| anti-Phospho-HSL            | Rabbit           | 45804      | Cell Signaling Technology |
| anti-HSL                    | Rabbit           | 18381      | Cell Signaling Technology |
| anti- $\beta$ 3-AR          | Rabbit           | PA5-50914  | Invitrogen                |
| anti-cAMP                   | Mouse [250532]   | MAB2146    | R&D Systems               |
| anti-rabbit IgG, HRP-linked | Goat             | 7074       | Cell Signaling Technology |
| anti-mouse IgG, HRP-linked  | Horse            | 7076       | Cell Signaling Technology |
| anti-mouse IgG (Alexa 488)  | Goat             | ab150117   | Abcam                     |
| anti-rabbit IgG (Alexa 647) | Goat             | A21244     | Life Technologies         |

**Table S3: qPCR primer list**

| Murine Gene Name                                                    | Forward Primer (5' to 3') | Reverse Primer (5' to 3')           |
|---------------------------------------------------------------------|---------------------------|-------------------------------------|
| Gdf3 (growth differentiation factor 3)                              | CTTCTCCCAGACCAGGGTTTT     | TCTAGAGTCAGCTGGGCCAT                |
| Gdf3 (codon optimized inTetOn-mGdf3 plasmid)                        | GGTACAGCAGGGTGACAGTG      | GCAAAATCCCTTAGGCACGG                |
| Tbp (TATA-box binding protein)                                      | CCCTATCACTCCTGCCACACCAGC  | GTGCAATGGTCTTTAGGTCAAGT<br>TTACAGCC |
| Id1 (inhibitor Of DNA Binding 1)                                    | CCTAGCTGTTCGCTGAAGGC      | CTCCGACAGACCAAGTACCAC               |
| Id2 (inhibitor Of DNA Binding 2)                                    | ATGAAAGCCTTCAGTCCGGTG     | AGCAGACTCATCGGGTCGT                 |
| Id4 (inhibitor Of DNA Binding 4)                                    | CAGTGCGATATGAACGACTGC     | GACTTTCTTGTTGGGCGGGAT               |
| Lamb3 (laminin subunit Beta 3)                                      | GGCTGCCTCGAAATTACAACA     | ACCCTCCATGTCTTGCCAAAG               |
| Zbtb16 (zinc finger and BTB domain containing 16)                   | CTGGGACTTTGTGCGATGTG      | CGGTGGAAGAGGATCTCAAACA              |
| Snai2 (snail family transcriptional repressor 2)                    | TGGTCAAGAAACATTTCAACGCC   | GGTGAGGATCTCTGGTTTTGGTA             |
| Slpi (secretory leukocyte peptidase inhibitor)                      | GGCCTTTTACCTTTCACGGTG     | TACGGCATTGTGGCTTCTCAA               |
| Hdac4 (histone deacetylase 4)                                       | CTGCAAGTGGCCCCTACAG       | CTGCTCATGTTGACGCTGGA                |
| Adamts4 (ADAM metalloproteinase with thrombospondin type 1 motif 4) | ATGGCCTCAATCCATCCCAG      | AAGCAGGGTTGGAATCTTTGC               |
| Adamts5 (ADAM metalloproteinase with thrombospondin type 1 motif 5) | GGAGCGAGGCCATTTACAAC      | CGTAGACAAGGTAGCCCACTTT              |

|                                                                     |                         |                         |
|---------------------------------------------------------------------|-------------------------|-------------------------|
| Adamts7 (ADAM metalloproteinase with thrombospondin type 1 motif 7) | AGTGTCCCAACCTGCCATTG    | CCTAGAGCCTTGGTGCTTGTA   |
| Col3a1 (collagen type III alpha 1 chain)                            | CTGTAACATGGAACTGGGGAAA  | CCATAGCTGAACTGAAAACCACC |
| Col5a3 (collagen type V alpha 3 chain)                              | CGGGGTACTCCTGGTCCTAC    | GCATCCCTACTTCCCCCTTG    |
| Col18a1 (collagen type XVIII alpha 1 chain)                         | GTGCCCATCGTCAACCTGAA    | GACATCTCTGCCGTCAAAAGAA  |
| Col27a1 (collagen type XXVII alpha 1 chain)                         | CCTTCCCGTAGGGACTCCAT    | GGCACAGTAATTGTGAGCGAC   |
| Adrb3 (adrenergic receptor beta 3)                                  | GGCCCTCTCTAGTTCCCAG     | TAGCCATCAAACCTGTTGAGC   |
| Pparγ (Peroxisome proliferator-activated receptor gamma)            | GCATGGTGCCTTCGCTGA      | TGGCATCTCTGTGTCAACCATG  |
| AdipoQ (Adiponectin)                                                | TGTTCTCTTAATCCTGCCCA    | CCAACCTGCACAAGTTCCCTT   |
| Leptin                                                              | GAGACCCCTGTGTCGGTTC     | CTGCGTGTGTGAAATGTCATTG  |
| Perf-1 (Preadipocyte factor 1)                                      | CCTGGGTTCTCTGGAAAGGACTG | TGGTTGCGGCTACGATCTCAC   |

**A**

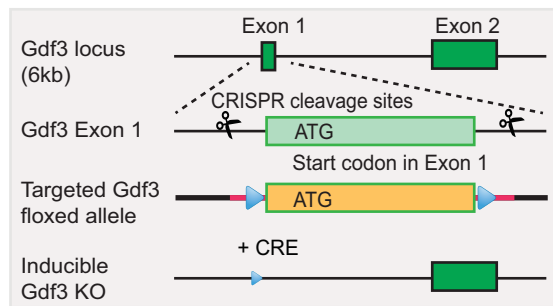

**B**

Body weight ♂

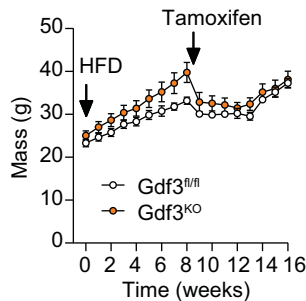

**C**

Body weight change ♂

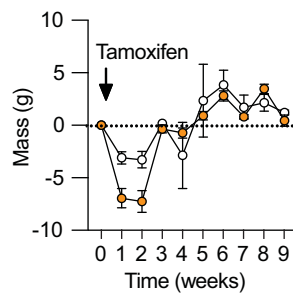

**D**

Body Composition ♂

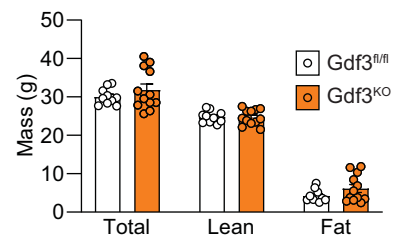

**E**

Body weight ♀

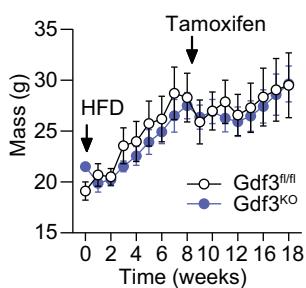

**F**

Body weight change ♀

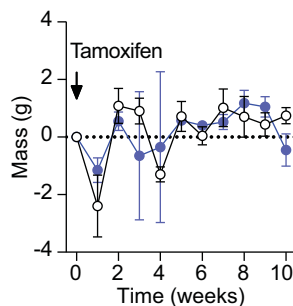

**G**

GTT ♀

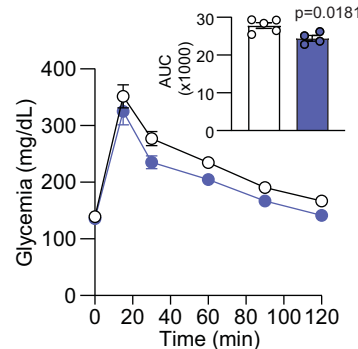

**H**

ITT ♀

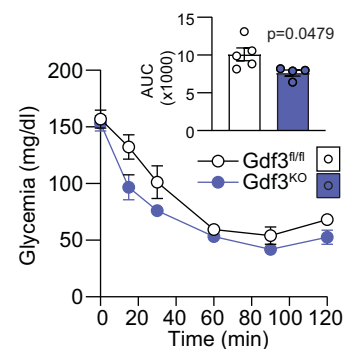

**I**

iWAT explant ♀

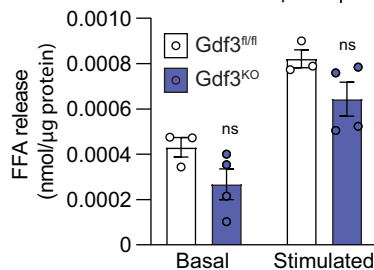

**J**

eWAT explant ♀

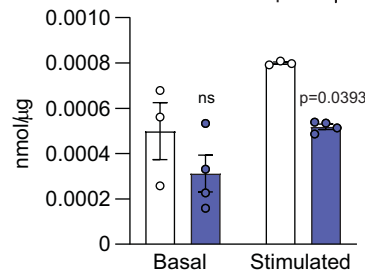

## Supplementary Figure 1

A) Graphical representation of the *Gdf3* locus where CRISPR cas9 sites were integrated to span exon 1, such that upon Cre recombinase activity, exon 1 of *Gdf3* would be deleted, leading to *GDF3* KO mice or cells. B) Body weights of adult male *Gdf3*<sup>fl/fl</sup> and *Gdf3*<sup>fl/fl</sup>::*Rosa-Cre*<sup>ERT2/-</sup> mice over time from the onset of HFD feeding and during and after tamoxifen injections to generate *Gdf3*<sup>fl/fl</sup> control and *Gdf3*<sup>KO</sup> mice (n = 9/10). C) Body weight change after tamoxifen injections in mice in (B). D) Body composition of mice in (B) at week 14. B-D) n = 10 *Gdf3*<sup>fl/fl</sup>, 11 *Gdf3*<sup>KO</sup>. E-J) Adult female *Gdf3*<sup>fl/fl</sup> and *Gdf3*<sup>fl/fl</sup> x *Rosa-Cre*<sup>ERT2/-</sup> mice, fed HFD for 8 weeks followed by tamoxifen injections to generate *Gdf3*<sup>fl/fl</sup> control and *Gdf3*<sup>KO</sup> mice (n = 4). E) Body weights from the onset of HFD feeding. F) Body weight change after tamoxifen injections in mice in (E). G) Left: GTT, 4 weeks post tamoxifen injections (glucose dose: 1g/kg BW, IP). Right inset: AUC of GTT. H) Left: ITT, 5 weeks post tamoxifen injections (insulin dose: 0.75U/kg BW, IP). Right inset: AUC of ITT. E-H) n = 5 *Gdf3*<sup>fl/fl</sup>, 4 *Gdf3*<sup>KO</sup>. I-J) FFA release from tissue explants at baseline and following lipolytic stimulation with isoproterenol (n = 3 *Gdf3*<sup>fl/fl</sup>, 4 *Gdf3*<sup>KO</sup>). I) iWAT, J) eWAT. Statistical comparisons were made using two way ANOVA with Sidak's multiple comparisons (B, C, E, F, I, J), unpaired two-tailed Student's t-test (D, G, H). B-J) Data are presented as mean values +/- SEM, ns = not significant. Source data are provided as a Source Data file.

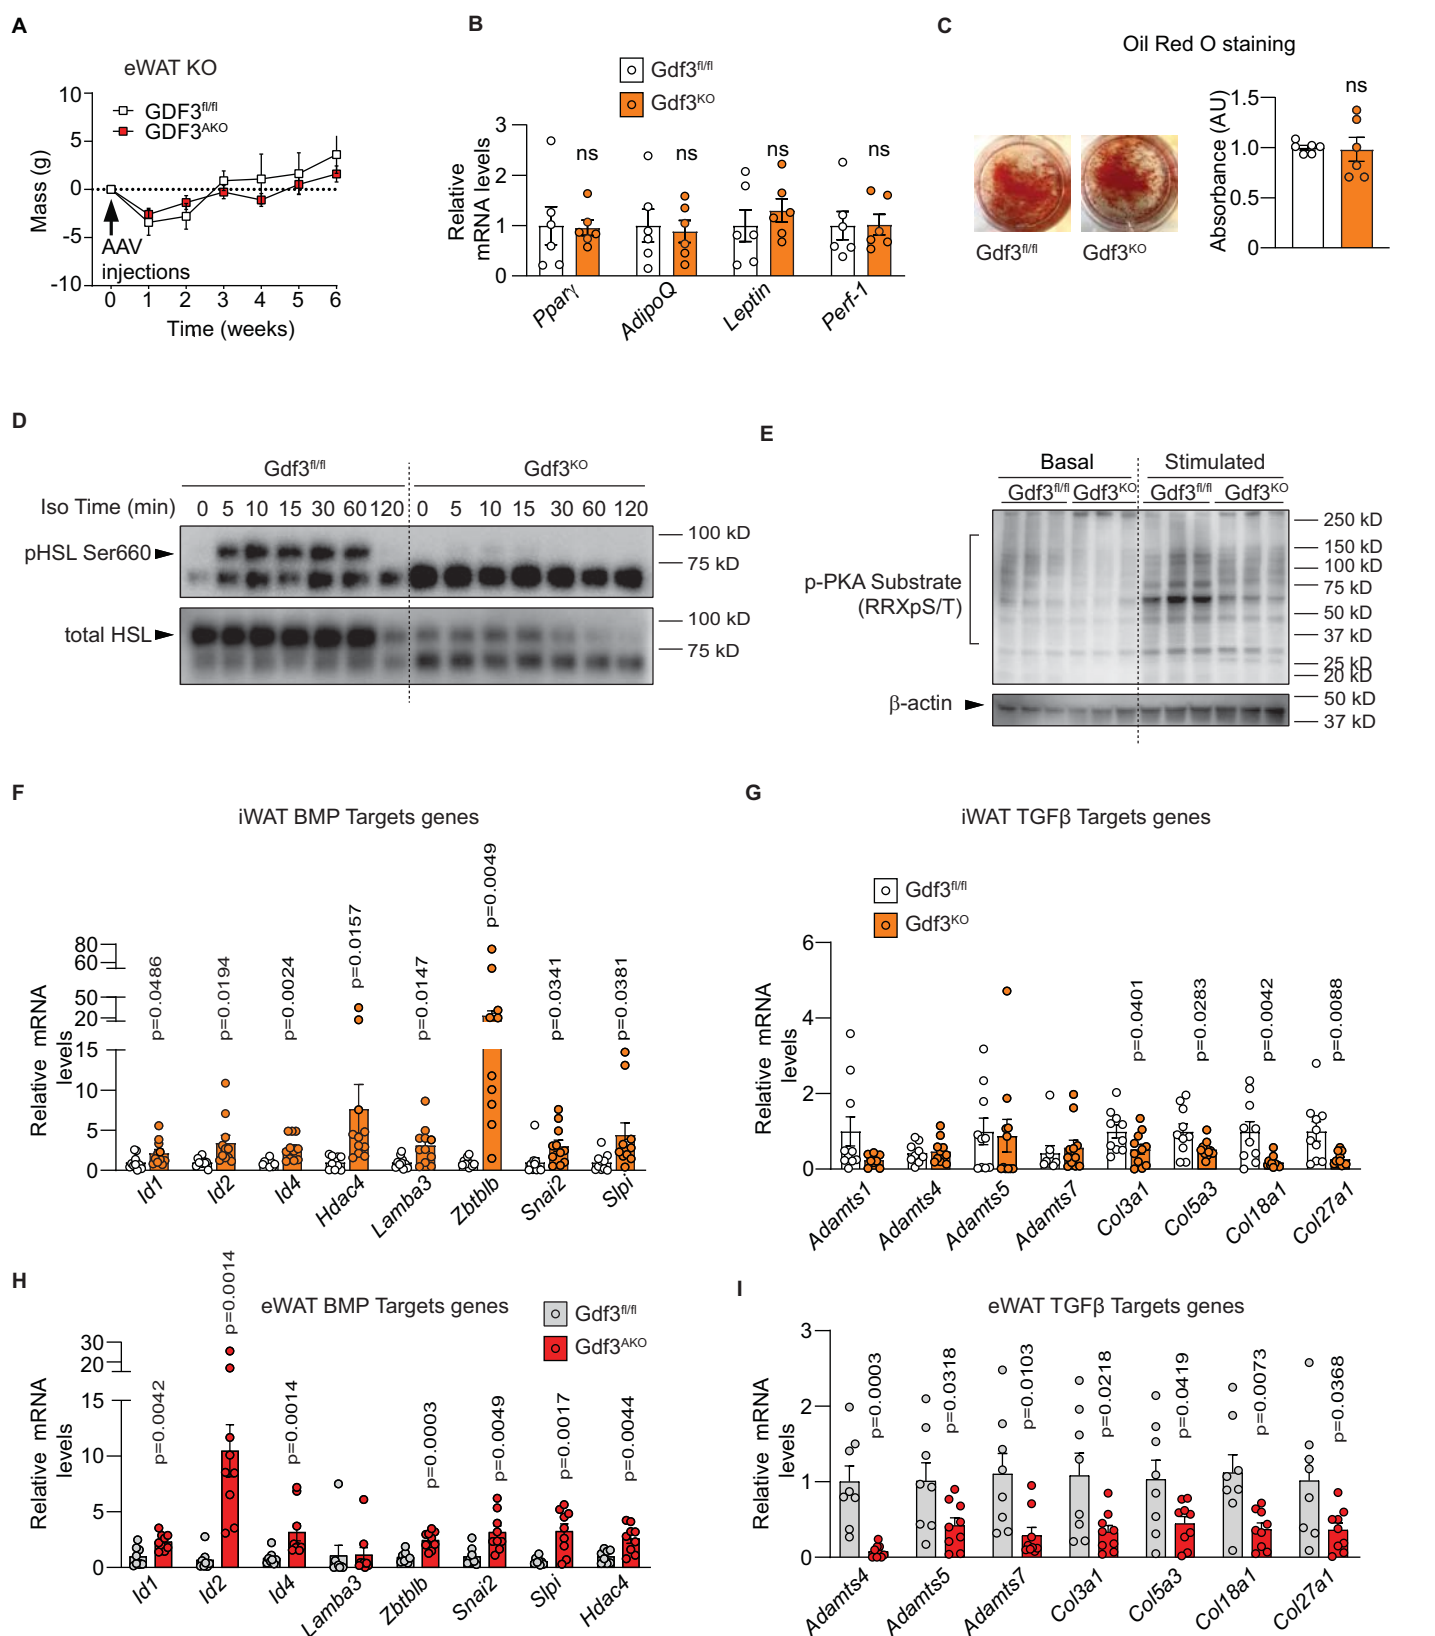

**Supplementary Figure 2**

A) Body weight changes after AAV injections in mice from Figure 2 ( $n = 8$   $Gdf3^{fl/fl}$ ,  $9$   $Gdf3^{AKO}$ ). B) RT-qPCR analysis of adipogenic genes in cultured primary  $Gdf3^{fl/fl}$  and  $Gdf3^{KO}$  adipocytes ( $n = 6$ ). C) Left: Representative images of oil red O staining of cultured primary  $Gdf3^{fl/fl}$  and  $Gdf3^{KO}$  adipocytes. Right: Quantification of oil red O from stained cultured primary  $Gdf3^{fl/fl}$  and  $Gdf3^{KO}$  adipocytes ( $n = 6$ ). D-E) Western blot analysis following lipolytic stimulation with isoproterenol for indicated time points. D) Phosphorylated hormone-sensitive lipase at serine 660 (pHSL Ser 660) and corresponding total HSL. E) Phosphorylated protein kinase A (p-PKA) substrates prior to (basal) and after 15 minutes of isoproterenol (Stimulated).  $\beta$ -actin levels serve as the loading control ( $n = 3$  biological replicates per group). F-G) RT-qPCR analysis of genes in iWAT of  $Gdf3^{fl/fl}$  and  $Gdf3^{KO}$  mice from Figure 1. F) BMP signaling targets ( $n = 10$   $Gdf3^{fl/fl}$ ,  $11$   $Gdf3^{KO}$ ). G) TGF $\beta$  signaling targets ( $n = 10$   $Gdf3^{fl/fl}$ ,  $11$   $Gdf3^{KO}$  except for *Adams4* and *Adams7* where  $n = 9$   $Gdf3^{fl/fl}$ ,  $11$   $Gdf3^{KO}$ ). H-I) RT-qPCR analysis of genes in eWAT of  $Gdf3^{fl/fl}$  and  $Gdf3^{AKO}$  mice from Figure 2 ( $n = 8$   $Gdf3^{fl/fl}$ ,  $9$   $Gdf3^{AKO}$ ). H) BMP signaling targets. I) TGF $\beta$  signaling targets. A-C, F-I) Statistical comparisons were made using two way ANOVA with Sidak's multiple comparisons (A), unpaired two-tailed Student's t-test (B, C, F-I). A-C, F-I) Data are presented as mean values  $\pm$  SEM, ns = not significant. Source data are provided as a Source Data file.

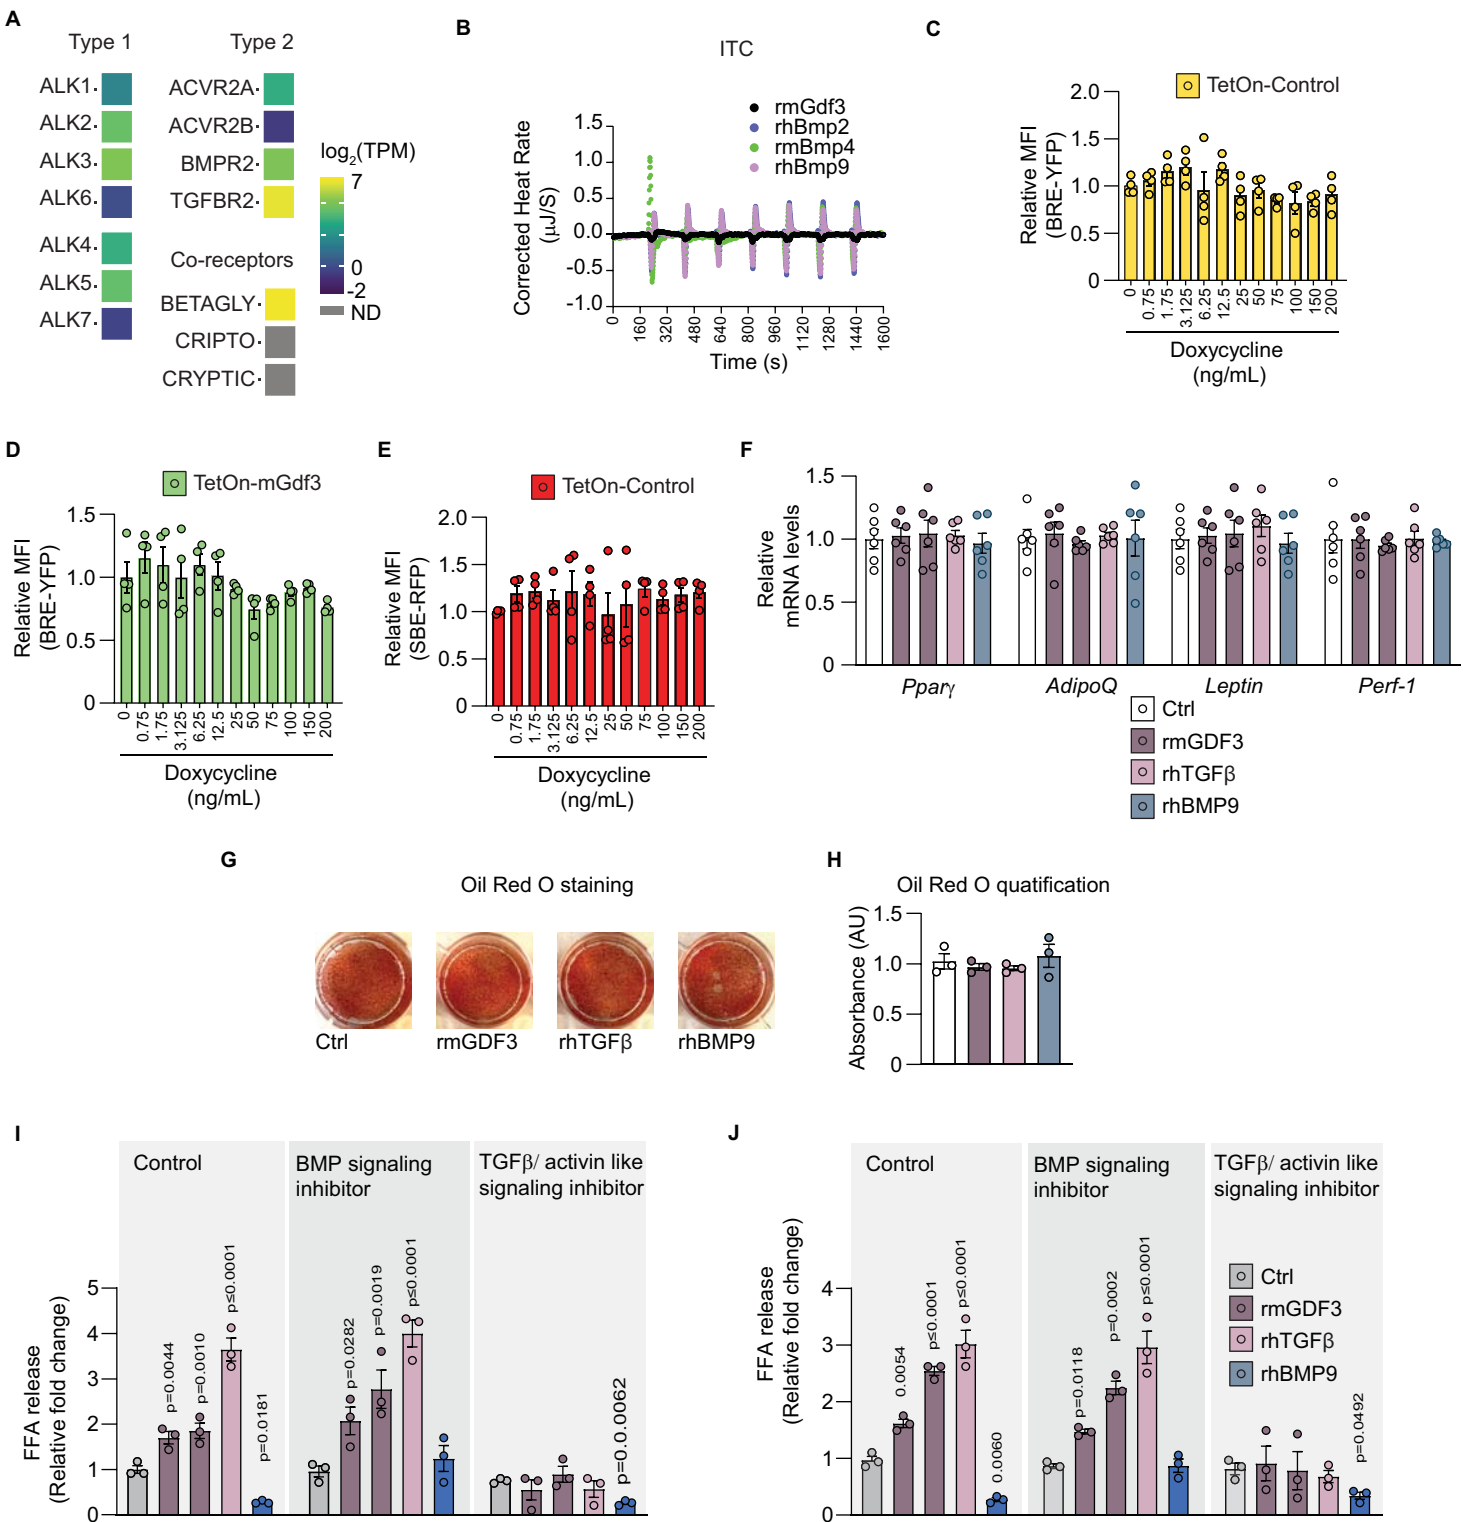

**Supplementary Figure 3**

A) mRNA expression levels of indicated receptors and coreceptors from RNA seq data set of immortalized murine differentiated adipocytes (E-MTAB-2624 from ArrayExpress as described in Shinoda et al. Nat Med. 2015 Apr;21(4):389-94. doi: 10.1038/nm.3819). B) Isothermal Titration Calorimetry (ITC) assay showing the binding isotherm for the titration of 250ng/mL rhBMP2, rmBMP4 or rhBMP9 against 250ng/mL of rhGDF3. C-E) C2C12 dual reporter myoblasts were transiently transfected with TetOn-Control or TetOn-mGdf3 vectors as indicated for 24 hours, followed by doxycycline treatment at increasing doses in serum-free media for 48 hours. Cells expressing YFP, RFP, and BFP were sorted by flow cytometry and analyzed for changes in reporter activity ( $n = 4$  biological replicates, where each  $n$  represents the average MFI of all triple positive live cells per well). C) Relative MFI of BRE-YFP in cells transfected with TetOn-Control. D) Relative MFI of BRE-YFP in cells transfected with TetOn-mGdf3. E) Relative MFI of SBE-RFP in cells transfected with TetOn-Control. F-H) Immortalized murine iWAT SVF cells were cultured and differentiated into mature adipocytes followed by treatment with the indicated recombinant proteins under serum free conditions. Recombinant doses: rmGdf3 (500 and 1000 ng/mL); rhTGF $\beta$ 1 (5 ng/mL); rhBMP9 (125 ng/mL). F) RT-qPCR analysis of adipogenic genes ( $n = 6$ ). G) Representative images of Oil red O staining. H) Quantification of oil red O staining ( $n = 3$ ). I-J) Relative free fatty acid release from cultured adipocytes serum starved for three hours, pretreated with serum free media alone (Control) or LDN193189 (BMP signaling inhibitor, 0.5  $\mu$ M) or SB-431542 (TGF $\beta$ /activin-like signaling inhibitor, 5  $\mu$ M) for 1 hour, followed by 24 hours of incubations with recombinant proteins prior to beta adrenergic stimulation with isoproterenol for two hours. Recombinant doses: rmGDF3 (500, 1000 ng/mL); rhTGF $\beta$ 1 (2.5 ng/mL); rhBMP2 (63 ng/mL) (I) or rmBMP4 (63 ng/mL) (J); ( $n = 3$ ). C-F, H-J) Statistical comparisons were made using one way ANOVA with Dunnett's multiple comparisons test. C-F, H-J) Data are presented as mean values  $\pm$  SEM, ns = not significant. Source data are provided as a Source Data file.

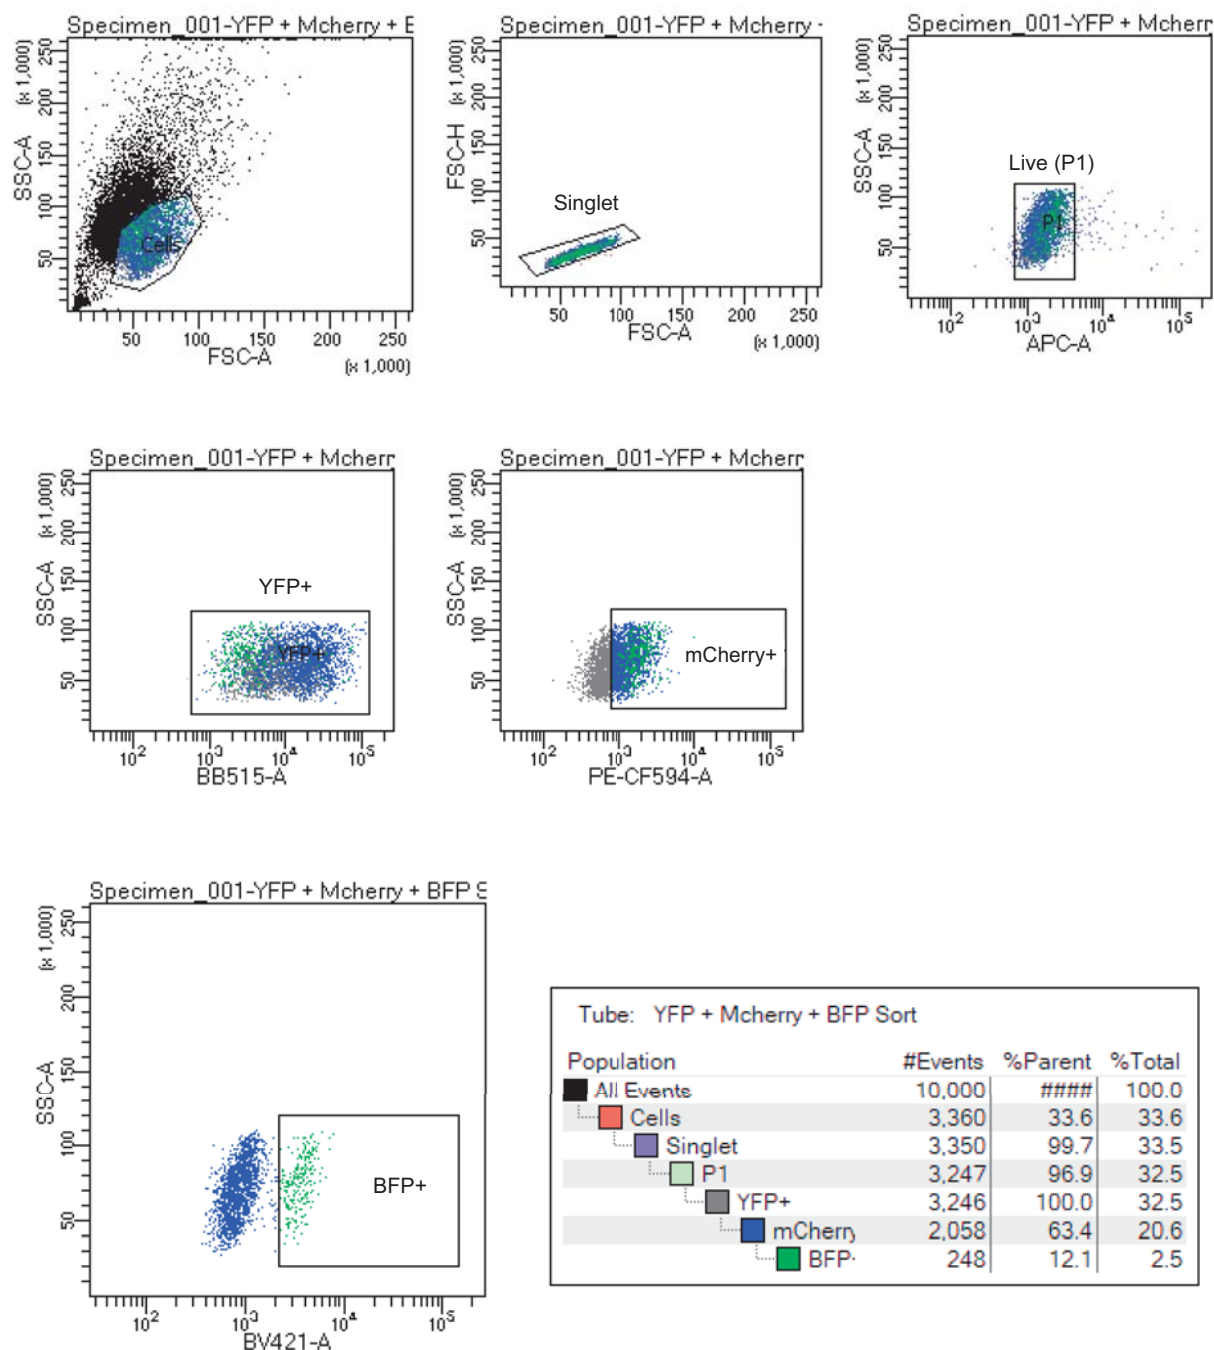

**Supplementary Figure 4**

Representative gating strategy for flow cytometry analysis. C2C12 dual reporter cells (YFP and mCherry double positive cells), were transiently transfected with a vector expressing doxycycline inducible TetOnControl or TetOn-Gdf3 (expressing BFP). Cells triple positive for YFP, RFP (mCherry) and BFP were sorted for analysis and the mean fluorescence intensities (MFI) of YFP and RFP of these cells were plotted for analysis. Similarly, for the double positive preadipocyte reporter cells, YFP and RFP double positive cells were sorted for analysis of MFI's of YFP and RFP.
